# Supplementary material
Source: publisher figshare collection journal article supplement (https://frontiersin.figshare.com/ndownloader/files/15047150)
Supplement: Supplementary file [file 15047150]

## **Supplemental Information**

This document contains:

Additional materials used in the immigration IAT study, namely Explicit Questions and Demographic Information

### **1. Explicit Questions and Demographic Information**

To what extent do you think UK immigration levels are too high? (far too low; too low; just the right level; too high; far too high)

Do you agree that those countries with greater resources should allow asylum to more refugees (yes; no)

To what extent do you feel similar to immigrants to your county? (very dissimilar; slightly dissimilar; neither dissimilar nor similar; slightly similar; very similar)

Did you vote to leave or remain in the recent (2016) EU membership referendum? (leave; remain; did not vote)

Which political party did you vote in the last general election? (Labour Party; Conservative Party; Liberal Democrats; Green Party; UK Independence Party; Other Party)

How much do you agree or disagree with the following statement: "For some crimes, the death penalty is the most appropriate sentence" (Strongly disagree; Disagree; Neither agree nor disagree; Agree; Strongly agree)

Which of the following newspapers do you read and how often? (The Daily Express; The Daily Mail; The Financial Times; The Guardian; The Independent; The Sun; The Telegraph; The Times – daily; more than once per week; once per week; occasionally; never)

How much would you say you trust the following newspapers for their news content? (The Daily Express; The Daily Mail; The Financial Times; The Guardian; The Independent; The Sun; The Telegraph; The Times - trust completely; trust somewhat; neither trust nor distrust; distrust somewhat; distrust completely)

Please list any other news sources you regularly use

What is your gender? (male; female; other; prefer not to say)

What is your age?

Were you born in the UK? (Yes; No)

What is the highest level of education you have completed? (no formal schooling; primary school; secondary/high school; further education; Bachelor's degree; Master's degree; Doctoral degree)
